# Supplementary material
Source: Research Square preprint supplement (doi:10.21203/rs.3.rs-9808390/v1)
Supplement: Supplementary file 1 [file 1e045bfcdc5d0160e28ddcee.docx]

**Declaration of interests**

The authors declare that they have no known competing financial interests or personal relationships that could have appeared to influence the work reported in this paper.

The authors declare the following financial interests/personal relationships which may be considered as potential competing interests:
